# Supplementary material for: Post-Golgi anterograde transport requires GARP-dependent endosome-to-TGN retrograde transport
Source: PubMed Central journal article supplement — Mol Biol Cell. 2015 Sep 1;26(17):3071–84. doi: 10.1091/mbc.E14-11-1568 (PMC4551320; doi:10.1091/mbc.e14-11-1568), 2015-09-01
Supplement: supp_E14-11-1568v1_CombinedSupMats.pdf [file supp_E14-11-1568v1_CombinedSupMats.pdf]

# Supplemental Materials

*Molecular Biology of the Cell*

Hirata et al.

Table S1: Genome-wide screening in human haploid cell line

| Gene name    | Inactivating insertion(s) in Sort 2 cells | Other insertion(s) in Sort 2 cells | Inactivating insertion(s) in control cells | Other insertion(s) in control cells | P-val (Fisher's exact) | FDR P-val(Fisher's exact) |
|--------------|-------------------------------------------|------------------------------------|--------------------------------------------|-------------------------------------|------------------------|---------------------------|
| HCG25        | 18                                        | 13997                              | 3                                          | 43213                               | 6.00E-09               | 0.000140462               |
| COG8         | 11                                        | 14004                              | 0                                          | 43216                               | 1.89E-07               | 0.001656277               |
| VPS52        | 19                                        | 13996                              | 7                                          | 43209                               | 2.53E-07               | 0.001656277               |
| VPS54        | 16                                        | 13999                              | 4                                          | 43212                               | 2.83E-07               | 0.001656277               |
| PGAP1        | 8                                         | 14007                              | 1                                          | 43215                               | 9.09E-05               | 0.425528998               |
| ATF7IP       | 13                                        | 14002                              | 7                                          | 43209                               | 0.000146103            | 0.569751177               |
| JTB          | 9                                         | 14006                              | 3                                          | 43213                               | 0.000330441            | 1                         |
| FLNC         | 5                                         | 14010                              | 0                                          | 43216                               | 0.000880187            | 1                         |
| GSTO2        | 5                                         | 14010                              | 0                                          | 43216                               | 0.000880187            | 1                         |
| FSTL4        | 8                                         | 14007                              | 3                                          | 43213                               | 0.001023554            | 1                         |
| KIAA0182     | 7                                         | 14008                              | 2                                          | 43214                               | 0.001174045            | 1                         |
| GPANK1       | 12                                        | 14003                              | 10                                         | 43206                               | 0.002373619            | 1                         |
| LIPT1        | 4                                         | 14011                              | 0                                          | 43216                               | 0.003595064            | 1                         |
| WDR12        | 4                                         | 14011                              | 0                                          | 43216                               | 0.003595064            | 1                         |
| C11orf2      | 4                                         | 14011                              | 0                                          | 43216                               | 0.003595064            | 1                         |
| CS           | 4                                         | 14011                              | 0                                          | 43216                               | 0.003595064            | 1                         |
| PGAP2        | 6                                         | 14009                              | 2                                          | 43214                               | 0.003772688            | 1                         |
| GET4         | 5                                         | 14010                              | 1                                          | 43215                               | 0.004203689            | 1                         |
| SETD1B       | 5                                         | 14010                              | 1                                          | 43215                               | 0.004203689            | 1                         |
| C2orf28      | 8                                         | 14007                              | 5                                          | 43211                               | 0.004922297            | 1                         |
| MPPE1        | 7                                         | 14008                              | 4                                          | 43212                               | 0.006686019            | 1                         |
| LOC100128675 | 10                                        | 14005                              | 9                                          | 43207                               | 0.007621102            | 1                         |
| NRD1         | 6                                         | 14009                              | 3                                          | 43213                               | 0.008969972            | 1                         |
| SORBS3       | 6                                         | 14009                              | 3                                          | 43213                               | 0.008969972            | 1                         |
| ASTN2        | 6                                         | 14009                              | 3                                          | 43213                               | 0.008969972            | 1                         |
| TRIP11       | 8                                         | 14007                              | 6                                          | 43210                               | 0.009033442            | 1                         |
| ZSWIM6       | 5                                         | 14010                              | 2                                          | 43214                               | 0.011733186            | 1                         |
| ADAM9        | 5                                         | 14010                              | 2                                          | 43214                               | 0.011733186            | 1                         |
| C8orf34      | 5                                         | 14010                              | 2                                          | 43214                               | 0.011733186            | 1                         |
| ARL3         | 5                                         | 14010                              | 2                                          | 43214                               | 0.011733186            | 1                         |
| CDK17        | 5                                         | 14010                              | 2                                          | 43214                               | 0.011733186            | 1                         |
| CLIC4        | 7                                         | 14008                              | 5                                          | 43211                               | 0.012672754            | 1                         |
| C5orf44      | 7                                         | 14008                              | 5                                          | 43211                               | 0.012672754            | 1                         |
| LRIG2        | 4                                         | 14011                              | 1                                          | 43215                               | 0.014454575            | 1                         |
| ATP1B1       | 4                                         | 14011                              | 1                                          | 43215                               | 0.014454575            | 1                         |
| GLB1L        | 4                                         | 14011                              | 1                                          | 43215                               | 0.014454575            | 1                         |

|           |    |       |    |       |             |   |
|-----------|----|-------|----|-------|-------------|---|
| THBS4     | 4  | 14011 | 1  | 43215 | 0.014454575 | 1 |
| PPARGC1B  | 4  | 14011 | 1  | 43215 | 0.014454575 | 1 |
| PREP      | 4  | 14011 | 1  | 43215 | 0.014454575 | 1 |
| C7orf55   | 4  | 14011 | 1  | 43215 | 0.014454575 | 1 |
| NKAIN3    | 4  | 14011 | 1  | 43215 | 0.014454575 | 1 |
| FEN1      | 4  | 14011 | 1  | 43215 | 0.014454575 | 1 |
| KIRREL3   | 4  | 14011 | 1  | 43215 | 0.014454575 | 1 |
| C16orf72  | 4  | 14011 | 1  | 43215 | 0.014454575 | 1 |
| VPS53     | 4  | 14011 | 1  | 43215 | 0.014454575 | 1 |
| PIP4K2B   | 4  | 14011 | 1  | 43215 | 0.014454575 | 1 |
| MTMR9LP   | 3  | 14012 | 0  | 43216 | 0.01468301  | 1 |
| MTMR11    | 3  | 14012 | 0  | 43216 | 0.01468301  | 1 |
| XPR1      | 3  | 14012 | 0  | 43216 | 0.01468301  | 1 |
| KCTD3     | 3  | 14012 | 0  | 43216 | 0.01468301  | 1 |
| ATG7      | 3  | 14012 | 0  | 43216 | 0.01468301  | 1 |
| ASTE1     | 3  | 14012 | 0  | 43216 | 0.01468301  | 1 |
| AFP       | 3  | 14012 | 0  | 43216 | 0.01468301  | 1 |
| GPBP1     | 3  | 14012 | 0  | 43216 | 0.01468301  | 1 |
| MRPS27    | 3  | 14012 | 0  | 43216 | 0.01468301  | 1 |
| SKIV2L    | 3  | 14012 | 0  | 43216 | 0.01468301  | 1 |
| MIR4283-1 | 3  | 14012 | 0  | 43216 | 0.01468301  | 1 |
| ERLIN2    | 3  | 14012 | 0  | 43216 | 0.01468301  | 1 |
| TMEM9B    | 3  | 14012 | 0  | 43216 | 0.01468301  | 1 |
| TMEM109   | 3  | 14012 | 0  | 43216 | 0.01468301  | 1 |
| CPT1A     | 3  | 14012 | 0  | 43216 | 0.01468301  | 1 |
| RAP1B     | 3  | 14012 | 0  | 43216 | 0.01468301  | 1 |
| BANP      | 3  | 14012 | 0  | 43216 | 0.01468301  | 1 |
| LSMD1     | 3  | 14012 | 0  | 43216 | 0.01468301  | 1 |
| ARHGEF18  | 3  | 14012 | 0  | 43216 | 0.01468301  | 1 |
| GNRH2     | 3  | 14012 | 0  | 43216 | 0.01468301  | 1 |
| MORC2     | 3  | 14012 | 0  | 43216 | 0.01468301  | 1 |
| DOCK2     | 6  | 14009 | 4  | 43212 | 0.017800983 | 1 |
| SLC29A2   | 6  | 14009 | 4  | 43212 | 0.017800983 | 1 |
| PPIB      | 6  | 14009 | 4  | 43212 | 0.017800983 | 1 |
| KIAA0430  | 6  | 14009 | 4  | 43212 | 0.017800983 | 1 |
| SERPINF1  | 6  | 14009 | 4  | 43212 | 0.017800983 | 1 |
| C17orf48  | 6  | 14009 | 4  | 43212 | 0.017800983 | 1 |
| ACCN1     | 6  | 14009 | 4  | 43212 | 0.017800983 | 1 |
| LDB2      | 10 | 14005 | 11 | 43205 | 0.017859437 | 1 |
| BOLA2     | 11 | 14004 | 13 | 43203 | 0.018314878 | 1 |
| ALDH2     | 7  | 14008 | 6  | 43210 | 0.021714953 | 1 |

|            |    |       |    |       |             |   |
|------------|----|-------|----|-------|-------------|---|
| PDE4A      | 7  | 14008 | 6  | 43210 | 0.021714953 | 1 |
| MTA3       | 5  | 14010 | 3  | 43213 | 0.025000683 | 1 |
| LEPREL4    | 5  | 14010 | 3  | 43213 | 0.025000683 | 1 |
| SLC35E4    | 5  | 14010 | 3  | 43213 | 0.025000683 | 1 |
| HDAC4      | 12 | 14003 | 16 | 43200 | 0.025171751 | 1 |
| SMARCA2    | 9  | 14006 | 10 | 43206 | 0.025244373 | 1 |
| SETDB1     | 6  | 14009 | 5  | 43211 | 0.03113894  | 1 |
| MEIG1      | 6  | 14009 | 5  | 43211 | 0.03113894  | 1 |
| TSPEAR     | 13 | 14002 | 19 | 43197 | 0.032220786 | 1 |
| BOLA2B     | 12 | 14003 | 17 | 43199 | 0.033592516 | 1 |
| NTRK2      | 7  | 14008 | 7  | 43209 | 0.034396464 | 1 |
| ICMT       | 4  | 14011 | 2  | 43214 | 0.034956345 | 1 |
| NR5A2      | 4  | 14011 | 2  | 43214 | 0.034956345 | 1 |
| HOXD-AS2   | 4  | 14011 | 2  | 43214 | 0.034956345 | 1 |
| BMPR2      | 4  | 14011 | 2  | 43214 | 0.034956345 | 1 |
| NUP210     | 4  | 14011 | 2  | 43214 | 0.034956345 | 1 |
| PDZRN3     | 4  | 14011 | 2  | 43214 | 0.034956345 | 1 |
| ANAPC13    | 4  | 14011 | 2  | 43214 | 0.034956345 | 1 |
| PRDM10     | 4  | 14011 | 2  | 43214 | 0.034956345 | 1 |
| PTPN6      | 4  | 14011 | 2  | 43214 | 0.034956345 | 1 |
| CNOT2      | 4  | 14011 | 2  | 43214 | 0.034956345 | 1 |
| GGNBP2     | 4  | 14011 | 2  | 43214 | 0.034956345 | 1 |
| KAT2A      | 4  | 14011 | 2  | 43214 | 0.034956345 | 1 |
| CTDSPL2    | 8  | 14007 | 9  | 43207 | 0.035839671 | 1 |
| GNG7       | 12 | 14003 | 18 | 43198 | 0.043838165 | 1 |
| RFWD2      | 5  | 14010 | 4  | 43212 | 0.045039072 | 1 |
| RUVBL1     | 5  | 14010 | 4  | 43212 | 0.045039072 | 1 |
| PLAC8      | 5  | 14010 | 4  | 43212 | 0.045039072 | 1 |
| SERINC5    | 5  | 14010 | 4  | 43212 | 0.045039072 | 1 |
| DENND2A    | 5  | 14010 | 4  | 43212 | 0.045039072 | 1 |
| LINC00251  | 5  | 14010 | 4  | 43212 | 0.045039072 | 1 |
| WDR74      | 5  | 14010 | 4  | 43212 | 0.045039072 | 1 |
| ETV4       | 5  | 14010 | 4  | 43212 | 0.045039072 | 1 |
| ZNF236     | 5  | 14010 | 4  | 43212 | 0.045039072 | 1 |
| ZBTB32     | 5  | 14010 | 4  | 43212 | 0.045039072 | 1 |
| PATZ1      | 5  | 14010 | 4  | 43212 | 0.045039072 | 1 |
| NT5C2      | 11 | 14004 | 16 | 43200 | 0.046055532 | 1 |
| MRPL20     | 3  | 14012 | 1  | 43215 | 0.047946848 | 1 |
| PEF1       | 3  | 14012 | 1  | 43215 | 0.047946848 | 1 |
| DENND2C    | 3  | 14012 | 1  | 43215 | 0.047946848 | 1 |
| HIST2H2AA3 | 3  | 14012 | 1  | 43215 | 0.047946848 | 1 |

|              |    |       |    |       |             |   |
|--------------|----|-------|----|-------|-------------|---|
| IL6R         | 3  | 14012 | 1  | 43215 | 0.047946848 | 1 |
| OBSCN        | 3  | 14012 | 1  | 43215 | 0.047946848 | 1 |
| TSSC1        | 3  | 14012 | 1  | 43215 | 0.047946848 | 1 |
| LOC100505876 | 3  | 14012 | 1  | 43215 | 0.047946848 | 1 |
| SPRED2       | 3  | 14012 | 1  | 43215 | 0.047946848 | 1 |
| SATB2        | 3  | 14012 | 1  | 43215 | 0.047946848 | 1 |
| ULK4         | 3  | 14012 | 1  | 43215 | 0.047946848 | 1 |
| SEC22C       | 3  | 14012 | 1  | 43215 | 0.047946848 | 1 |
| GATA2        | 3  | 14012 | 1  | 43215 | 0.047946848 | 1 |
| GMPS         | 3  | 14012 | 1  | 43215 | 0.047946848 | 1 |
| IL7R         | 3  | 14012 | 1  | 43215 | 0.047946848 | 1 |
| C5orf39      | 3  | 14012 | 1  | 43215 | 0.047946848 | 1 |
| BTBD9        | 3  | 14012 | 1  | 43215 | 0.047946848 | 1 |
| PPP2R5D      | 3  | 14012 | 1  | 43215 | 0.047946848 | 1 |
| GTF3C6       | 3  | 14012 | 1  | 43215 | 0.047946848 | 1 |
| PTPN12       | 3  | 14012 | 1  | 43215 | 0.047946848 | 1 |
| SLC25A13     | 3  | 14012 | 1  | 43215 | 0.047946848 | 1 |
| TFR2         | 3  | 14012 | 1  | 43215 | 0.047946848 | 1 |
| LOC202781    | 3  | 14012 | 1  | 43215 | 0.047946848 | 1 |
| TSPAN14      | 3  | 14012 | 1  | 43215 | 0.047946848 | 1 |
| GBF1         | 3  | 14012 | 1  | 43215 | 0.047946848 | 1 |
| ZFP91-CNTF   | 3  | 14012 | 1  | 43215 | 0.047946848 | 1 |
| SUV420H1     | 3  | 14012 | 1  | 43215 | 0.047946848 | 1 |
| LAMTOR1      | 3  | 14012 | 1  | 43215 | 0.047946848 | 1 |
| FOXM1        | 3  | 14012 | 1  | 43215 | 0.047946848 | 1 |
| ZC3H10       | 3  | 14012 | 1  | 43215 | 0.047946848 | 1 |
| VSIG10       | 3  | 14012 | 1  | 43215 | 0.047946848 | 1 |
| ZBTB1        | 3  | 14012 | 1  | 43215 | 0.047946848 | 1 |
| LYSMD2       | 3  | 14012 | 1  | 43215 | 0.047946848 | 1 |
| MYZAP        | 3  | 14012 | 1  | 43215 | 0.047946848 | 1 |
| KIF7         | 3  | 14012 | 1  | 43215 | 0.047946848 | 1 |
| CIAPIN1      | 3  | 14012 | 1  | 43215 | 0.047946848 | 1 |
| MLKL         | 3  | 14012 | 1  | 43215 | 0.047946848 | 1 |
| SMG6         | 3  | 14012 | 1  | 43215 | 0.047946848 | 1 |
| ME2          | 3  | 14012 | 1  | 43215 | 0.047946848 | 1 |
| SLC13A3      | 3  | 14012 | 1  | 43215 | 0.047946848 | 1 |
| HUNK         | 3  | 14012 | 1  | 43215 | 0.047946848 | 1 |
| ZC3H7B       | 3  | 14012 | 1  | 43215 | 0.047946848 | 1 |
| BCAP31       | 3  | 14012 | 1  | 43215 | 0.047946848 | 1 |
| EXOC4        | 14 | 14001 | 23 | 43193 | 0.049350092 | 1 |
| KIAA1797     | 6  | 14009 | 6  | 43210 | 0.049605127 | 1 |

|        |   |       |   |       |             |   |
|--------|---|-------|---|-------|-------------|---|
| TAOK1  | 6 | 14009 | 6 | 43210 | 0.049605127 | 1 |
| HSF2BP | 6 | 14009 | 6 | 43210 | 0.049605127 | 1 |

Genes showing P-value > 0.05 were eliminated from this table.

Blue; Genes encoding the subunit of GARP complex

Pink; Genes encoding GPI remodeling enzyme

Table S2: List of KO cells

| gene            | cell                                                                                                     | DNA sequence                                                                                              | amino acid sequence                                                     |
|-----------------|----------------------------------------------------------------------------------------------------------|-----------------------------------------------------------------------------------------------------------|-------------------------------------------------------------------------|
| VPS51           | wild-type                                                                                                | GGCCCCGAGGGGAGGCTCCGGAGCGTCGCGCGGAAGGCGCACGGGATG                                                          | MAAAAAAGPSFGSGPGDSPEGPEGEAPERERRRKAHGM                                  |
|                 | V51 KO                                                                                                   | GGCCCCGAGGGGAGGCTCCGGAGCGT <b>GCGGCGGAAGGCGCACGGGATG</b>                                                  | MAAAAAAGPSFGSGPGDSPEGPEGEAPER <b>AAEGARDAEALLRPLGRGGGGT</b> PRGARPPGPD* |
|                 |                                                                                                          | GGCCCCGAGGGGAGGCTCCGGAG-----GAAGGCGCACGGGATG                                                              | MAAAAAAGPSFGSGPGDSPEGPEGEAPER <b>EGARDAEALLRPLGRGGGGT</b> PRGARPPGPD*   |
| VPS52           | wild-type                                                                                                | GCGGCTGCGGCCCGGAACTGGTGTTCGCGGCTGGGACCTCAGA                                                               | MAAAATMAAAARELVLRAGTS                                                   |
|                 | V52 KO                                                                                                   | GCGGCTGCGGCCCGGAACTGGTGGTATTGGCGGCAA...                                                                   | MAAAATMAAAARELGGIGGNQQQIRDANLCCGGGLQRGEQGV*                             |
|                 |                                                                                                          | GCGGCTGCGGCCCGGAACTGGTGTATTGACGTCAATGGGTGGGGTTCGT<br>TGGGC...                                             | MAAAATMAAAARELVY*                                                       |
| VPS53           | wild-type                                                                                                | AGCCGTGCTGCAGCTCACGCCGAGGTGCAGCTGGCCATCGAGCAG                                                             | MMEEEEELEFVEELEAVLQLTPEVQLAIEQ                                          |
|                 | V53 KO                                                                                                   | AGCCGTGCTGCAGCTCACGCCGAGGTG-AGCTGGCCATCGAGCAG                                                             | MMEEEEELEFVEELEAVLQLTPEVSWPSSRCFQARTL*                                  |
|                 |                                                                                                          | AGCCGTGCTGCAGCTCACGCCGAGGTGCGTGTATGCTCGT...                                                               | MMEEEEELEFVEELEAVLQLTPEVRDARQGGGTRQD...PVTIVLSPTR*                      |
|                 |                                                                                                          | AGCCGTGCTGCAGCTCACGCCGAGGTGTTTTGCTGGC...<br>CCAGCAGGCCAGCTGGCCATCGAGCAG                                   | MMEEEEELEFVEELEAVLQLTPEVLLLAFCSHVRAFFP*                                 |
| VPS54           | wild-type                                                                                                | ATGGCTTCAAGCCACAGTTCTTCACCAGTGCCTCAAGGAAGCAGCA...<br>ATTCGACCTGTGCCATCACTGCCAGATGTGTGTCCAAGGAACCCACAG     | MASSHSSSPVPOGSSSDVFFKIEVDPSKHIRPVPSLPDVCPEPT                            |
|                 | V54 KO                                                                                                   | ATGGCTTCAAGCCACAGTGCAGATGTGTGTCCAAGGAACCCACAG                                                             | MASSHSCQMCVPRNPQVIHIVYMLPHL*                                            |
|                 |                                                                                                          | ATGGCTTCAAGCCACAGCAGCAGATTGCGCTGGATGACCAGAAAGAGCGA<br>GGAAACCACTGCCAGATGTGTGTCCAAGGAACCCACAG              | MASSHSSRFAWMTRKSEETTARCVSQGTHR*                                         |
| TMEM87A         | wild-type                                                                                                | GCTAAGGAGAATGGAACAAACCTTACCTTTATTGGAGACAAAACC                                                             | MAAAALQVL...AKENGTNLTFIGDKTAMHEPL                                       |
|                 | TM87A, B-DKO #1                                                                                          | GCTAAGGAGAATGGAACAAACCTTACCTT-ATTGGAGACAAAACC                                                             | MAAAALQVL...AKENGTNLT <b>LETKPQCMNHCKLGMHHTFLLYILAFHPQRNHQKKIH*</b>     |
|                 | TM87A, B-DKO #2                                                                                          | GCTAAGGAGAATGGAACAAACCTTACCTT-ATTGGAGACAAAACC                                                             | MAAAALQVL...AKENGTNLT <b>LETKPQCMNHCKLGMHHTFLLYILAFHPQRNHQKKIH*</b>     |
| TMEM87B         | wild-type                                                                                                | GGCTCCTGCCACGCCCGCCGCTGCTTTCCCGCCCGGGCCCGCTGC<br>TGCGCGTCGCCCTC                                           | MVAACRSV...LCWTPAAVRAVPELGLWL                                           |
|                 | TM87A, B-DKO #1                                                                                          | GGCTCCTGCCACGCCCGCCGCTGCTTTCCCGGTGCTCCAGGTAATTA<br>AACATTAATACCCCAACCAACGCCCGGGCCCGCTGCTGCGCGTCGC<br>CCTC | MVAACRS...PRRRRCFP <b>GAPGN*</b>                                        |
|                 |                                                                                                          | GGCTCCTGCCACGCCCGCCGCTGCTTTCCCGCCCGGGCCCGCTGC<br>TGCGCGTCGCCCTC                                           | MVAACRS...PRRRRCFP <b>RPGPAAARRPLPPVLDPGGCARGP*</b>                     |
|                 |                                                                                                          | GGCTCCTGCCACGCCCGCCGCTGCTTTCC-----<br>-GCGCGTCGCCCTC                                                      | MVAACRS...PRRRRCFP <b>ARRPLPPVLDPGGCARGP*</b>                           |
|                 | wild-type                                                                                                | CTGTGCTGGACCCCGCGGCTGTGCGCGGTCCTGAGCTCGGGCTC                                                              | MVAACRSV...LCWTPAAVRAVPELGLWL                                           |
| TM87A, B-DKO #2 | CTGTGCTGGACCCCGCGGCTGTGCGCGGTCCTGAGCTCGGGCTC<br>CTGTGCTGGACCCCGCGGCTGTGCA <b>CGCGCGGTCCTGAGCTCGGGCTC</b> | MVAACRSV...LCWTPAAV <b>PRGP*</b><br>MVAACRSV...LCWTPAAV <b>HARSLSSGSG*</b>                                |                                                                         |

\* : stop

Table S3: The screening of suppressor gene in VPS54KO cells

| Feature ID   | Test statistic (Kal's Z-test) | P-val (Kal's Z-test) | FDR P-val (Kal's Z-test) | Mapped reads in control cells | Mapped reads in the sorted cells |
|--------------|-------------------------------|----------------------|--------------------------|-------------------------------|----------------------------------|
| HIRA         | 1933.132898                   | 0                    | 0                        | 1412                          | 1414790                          |
| TMEM87A      | 94.36592116                   | 0                    | 0                        | 296                           | 5082                             |
| RILPL1       | 77.4144761                    | 0                    | 0                        | 387                           | 3742                             |
| MAST3        | 75.14206296                   | 0                    | 0                        | 566                           | 3844                             |
| WDR45        | 70.57010588                   | 0                    | 0                        | 541                           | 3454                             |
| RAE1         | 69.17085541                   | 0                    | 0                        | 19                            | 2469                             |
| PCYT2        | 66.03292299                   | 0                    | 0                        | 582                           | 3184                             |
| FLII         | 65.48859345                   | 0                    | 0                        | 689                           | 3297                             |
| SPP1         | 64.58974783                   | 0                    | 0                        | 3822                          | 6651                             |
| SLC2A6       | 64.40361367                   | 0                    | 0                        | 69                            | 2242                             |
| GSN          | 62.79882614                   | 0                    | 0                        | 2739                          | 5438                             |
| CELF5        | 61.12261931                   | 0                    | 0                        | 27                            | 1952                             |
| LOC100134015 | 59.37531078                   | 0                    | 0                        | 27                            | 1845                             |
| SLC45A4      | 58.48234453                   | 0                    | 0                        | 0                             | 1738                             |
| RYR2         | 57.99351265                   | 0                    | 0                        | 79                            | 1861                             |
| PTTG1IP      | 54.64473336                   | 0                    | 0                        | 590                           | 2446                             |
| PIN1         | 52.49922621                   | 0                    | 0                        | 652                           | 2398                             |
| CSNK1A1      | 52.42632839                   | 0                    | 0                        | 359                           | 1996                             |
| NOMO3        | 52.40256127                   | 0                    | 0                        | 394                           | 2045                             |
| ADAM9        | 51.86368367                   | 0                    | 0                        | 50                            | 1464                             |
| UPF1         | 50.85851994                   | 0                    | 0                        | 36                            | 1385                             |
| TBC1D10A     | 50.18801777                   | 0                    | 0                        | 280                           | 1757                             |
| C11orf73     | 49.73345027                   | 0                    | 0                        | 0                             | 1257                             |
| IGSF5        | 48.91545798                   | 0                    | 0                        | 0                             | 1216                             |
| TSPEAR       | 48.77443097                   | 0                    | 0                        | 0                             | 1209                             |
| LPCAT4       | 48.722533                     | 0                    | 0                        | 1181                          | 2788                             |
| SLC27A4      | 48.00105338                   | 0                    | 0                        | 1463                          | 3039                             |
| FJX1         | 46.70529024                   | 0                    | 0                        | 96                            | 1287                             |
| DDX56        | 46.58348531                   | 0                    | 0                        | 394                           | 1731                             |
| NFKBIL1      | 46.20793978                   | 0                    | 0                        | 52                            | 1185                             |
| MED17        | 45.90566381                   | 0                    | 0                        | 7                             | 1085                             |
| DROSHA       | 45.53324578                   | 0                    | 0                        | 173                           | 1358                             |
| ARPC1B       | 44.75415159                   | 0                    | 0                        | 202                           | 1366                             |
| C10orf103    | 44.33719532                   | 0                    | 0                        | 93                            | 1171                             |
| SMARCC2      | 43.66864898                   | 0                    | 0                        | 1131                          | 2433                             |
| COX6A1       | 43.34813994                   | 0                    | 0                        | 209                           | 1311                             |
| NCEH1        | 43.09161658                   | 0                    | 0                        | 277                           | 1398                             |
| SNX6         | 41.8582484                    | 0                    | 0                        | 96                            | 1066                             |



|              |             |   |   |      |      |
|--------------|-------------|---|---|------|------|
| YKT6         | 41.74728209 | 0 | 0 | 80   | 1034 |
| GEMIN6       | 41.20698477 | 0 | 0 | 0    | 863  |
| ABCC12       | 40.75855189 | 0 | 0 | 150  | 1106 |
| SLC2A12      | 39.53794623 | 0 | 0 | 195  | 1122 |
| TRIM44       | 38.83210063 | 0 | 0 | 45   | 852  |
| KHDRBS1      | 38.63486095 | 0 | 0 | 133  | 991  |
| POLD2        | 38.56621994 | 0 | 0 | 684  | 1686 |
| UBOX5        | 38.47102777 | 0 | 0 | 12   | 776  |
| TMEM132A     | 38.22799265 | 0 | 0 | 2122 | 3035 |
| C7orf43      | 37.9698684  | 0 | 0 | 472  | 1416 |
| GLDC         | 37.88978894 | 0 | 0 | 348  | 1260 |
| FAU          | 37.71889437 | 0 | 0 | 9    | 741  |
| LRSAM1       | 37.54132581 | 0 | 0 | 409  | 1321 |
| ANKRD12      | 37.12187855 | 0 | 0 | 102  | 882  |
| NLE1         | 36.90133546 | 0 | 0 | 22   | 735  |
| UBE2I        | 36.45873236 | 0 | 0 | 413  | 1279 |
| MRFAP1L1     | 36.13638336 | 0 | 0 | 219  | 1017 |
| ZNF282       | 35.9613341  | 0 | 0 | 54   | 758  |
| DLG3         | 35.92557454 | 0 | 0 | 292  | 1106 |
| DDX19A       | 35.68071482 | 0 | 0 | 21   | 688  |
| NUP160       | 35.63728296 | 0 | 0 | 218  | 996  |
| ALG12        | 35.59806171 | 0 | 0 | 21   | 685  |
| ATAD3B       | 35.52781142 | 0 | 0 | 272  | 1064 |
| CLCN6        | 35.34624848 | 0 | 0 | 0    | 635  |
| SART3        | 34.76815376 | 0 | 0 | 286  | 1052 |
| CTNNB1       | 33.57217483 | 0 | 0 | 1346 | 2086 |
| PEAK1        | 33.36994838 | 0 | 0 | 2    | 570  |
| WDR45L       | 33.08259217 | 0 | 0 | 360  | 1077 |
| NR3C1        | 32.73425575 | 0 | 0 | 243  | 919  |
| MFHAS1       | 32.67387671 | 0 | 0 | 197  | 856  |
| SLC39A13     | 32.67290193 | 0 | 0 | 69   | 667  |
| GUSBP9       | 32.64315644 | 0 | 0 | 23   | 586  |
| LOC100130581 | 32.59452942 | 0 | 0 | 1    | 542  |
| HLA-B        | 32.36861113 | 0 | 0 | 1825 | 2433 |
| HMOX2        | 32.32683817 | 0 | 0 | 156  | 787  |
| NCAPH2       | 31.95552222 | 0 | 0 | 5    | 529  |
| AGPAT5       | 31.44923697 | 0 | 0 | 181  | 791  |
| DDX25        | 30.98762321 | 0 | 0 | 369  | 1007 |
| LMBR1L       | 30.78969757 | 0 | 0 | 186  | 775  |
| CLDND1       | 30.61540239 | 0 | 0 | 265  | 870  |
| NFS1         | 30.4673864  | 0 | 0 | 321  | 932  |

|             |             |   |   |      |      |
|-------------|-------------|---|---|------|------|
| SMAD1       | 30.24689002 | 0 | 0 | 29   | 520  |
| SYF2        | 30.21439021 | 0 | 0 | 4    | 472  |
| FAM96B      | 29.80635962 | 0 | 0 | 87   | 602  |
| YTHDC1      | 29.09743845 | 0 | 0 | 59   | 536  |
| PRKCH       | 28.8011563  | 0 | 0 | 13   | 447  |
| GNAO1       | 28.76533447 | 0 | 0 | 1319 | 1819 |
| ULK3        | 28.42220182 | 0 | 0 | 1222 | 1720 |
| HEATR5B     | 27.69431856 | 0 | 0 | 200  | 691  |
| C16orf89    | 27.61378154 | 0 | 0 | 12   | 411  |
| MYH9        | 27.39959017 | 0 | 0 | 12   | 405  |
| U2AF1       | 27.36463046 | 0 | 0 | 554  | 1067 |
| VIT         | 27.0531338  | 0 | 0 | 0    | 372  |
| CHRNE       | 26.61318718 | 0 | 0 | 0    | 360  |
| PHB         | 26.52264644 | 0 | 0 | 944  | 1394 |
| PLXNB2      | 26.43906743 | 0 | 0 | 498  | 977  |
| PPM1K       | 26.42476823 | 0 | 0 | 182  | 629  |
| TMEFF2      | 26.34087061 | 0 | 0 | 537  | 1012 |
| SPOCK3      | 26.29614335 | 0 | 0 | 117  | 540  |
| AMPD2       | 26.10234123 | 0 | 0 | 967  | 1396 |
| RAB20       | 25.90095713 | 0 | 0 | 1    | 343  |
| ZFPM2       | 25.77276434 | 0 | 0 | 147  | 565  |
| SOWAHA      | 25.76412658 | 0 | 0 | 624  | 1074 |
| SEC14L2     | 25.52064825 | 0 | 0 | 170  | 587  |
| ZC3H18      | 25.47621428 | 0 | 0 | 156  | 568  |
| DCUN1D4     | 25.39346168 | 0 | 0 | 58   | 429  |
| HLTF        | 24.77726602 | 0 | 0 | 4    | 320  |
| SHMT2       | 24.58410663 | 0 | 0 | 363  | 776  |
| C17orf107   | 24.49589957 | 0 | 0 | 0    | 305  |
| DYRK4       | 24.41610135 | 0 | 0 | 3    | 309  |
| DERL2       | 24.13175872 | 0 | 0 | 0    | 296  |
| CRTAC1      | 24.06373845 | 0 | 0 | 704  | 1083 |
| HADH        | 23.72894458 | 0 | 0 | 77   | 414  |
| TSC22D3     | 23.20399646 | 0 | 0 | 1133 | 1410 |
| TMX2-CTNND1 | 22.96163723 | 0 | 0 | 1    | 270  |
| NCBP2       | 22.87315337 | 0 | 0 | 69   | 381  |
| CLCN7       | 22.68133735 | 0 | 0 | 1246 | 1477 |
| C9orf41     | 22.66855359 | 0 | 0 | 6    | 273  |
| ST18        | 22.51428462 | 0 | 0 | 16   | 288  |
| ABHD16A     | 22.24330882 | 0 | 0 | 644  | 963  |
| EXOSC5      | 22.21403501 | 0 | 0 | 95   | 401  |
| YEATS2      | 22.18509506 | 0 | 0 | 66   | 360  |

|             |             |   |   |      |      |
|-------------|-------------|---|---|------|------|
| FAM21C      | 22.03541177 | 0 | 0 | 170  | 490  |
| TOB1        | 21.97979509 | 0 | 0 | 40   | 316  |
| PLEKHB1     | 21.82956921 | 0 | 0 | 2763 | 2537 |
| ACCN2       | 21.68402132 | 0 | 0 | 0    | 239  |
| NHS         | 21.54357334 | 0 | 0 | 24   | 280  |
| COPB2       | 21.48159005 | 0 | 0 | 354  | 670  |
| ANKRD11     | 21.4648381  | 0 | 0 | 147  | 448  |
| SYS1-DBNDD2 | 21.46112531 | 0 | 0 | 420  | 733  |
| KIF13A      | 21.41009525 | 0 | 0 | 0    | 233  |
| FAM182B     | 21.23953634 | 0 | 0 | 341  | 650  |
| PINK1       | 20.95179848 | 0 | 0 | 4423 | 3584 |
| RNF26       | 20.93010957 | 0 | 0 | 98   | 374  |
| UFSP2       | 20.80422143 | 0 | 0 | 0    | 220  |
| CBFB        | 20.77255634 | 0 | 0 | 97   | 369  |
| UBR4        | 20.74758097 | 0 | 0 | 1238 | 1387 |
| SMO         | 20.60957428 | 0 | 0 | 23   | 258  |
| ATXN2L      | 20.28526851 | 0 | 0 | 162  | 436  |
| MED9        | 19.98423265 | 0 | 0 | 0    | 203  |
| C12orf51    | 19.87587481 | 0 | 0 | 35   | 262  |
| FOXRED1     | 19.83655431 | 0 | 0 | 85   | 332  |
| PSMD12      | 19.83601088 | 0 | 0 | 0    | 200  |
| SND1        | 19.78152709 | 0 | 0 | 1888 | 1818 |
| CNTNAP4     | 19.75164953 | 0 | 0 | 204  | 469  |
| GRB10       | 19.63791725 | 0 | 0 | 11   | 217  |
| TECR        | 19.60125915 | 0 | 0 | 627  | 857  |
| GDAP1L1     | 19.52165624 | 0 | 0 | 326  | 586  |
| CAMKK1      | 19.46224944 | 0 | 0 | 353  | 610  |
| SLC44A1     | 19.39825405 | 0 | 0 | 222  | 479  |
| ATP6AP1     | 19.35041521 | 0 | 0 | 3791 | 3069 |
| XYLT2       | 19.12913186 | 0 | 0 | 0    | 186  |
| SPSB3       | 19.03727684 | 0 | 0 | 640  | 849  |
| ANKRD9      | 18.62484917 | 0 | 0 | 6    | 188  |
| SFMBT1      | 18.36578559 | 0 | 0 | 101  | 320  |
| PTPRB       | 18.00040684 | 0 | 0 | 79   | 285  |
| FAM65A      | 17.97827092 | 0 | 0 | 975  | 1076 |
| SERF1B      | 17.85620948 | 0 | 0 | 3    | 168  |
| FZD3        | 17.7953928  | 0 | 0 | 23   | 202  |
| ZNF324B     | 17.74180317 | 0 | 0 | 0    | 160  |
| CWC15       | 17.68627153 | 0 | 0 | 0    | 159  |
| PI4KAP1     | 17.29368519 | 0 | 0 | 25   | 196  |
| COPS5       | 17.26955416 | 0 | 0 | 78   | 269  |

|            |             |   |   |      |      |
|------------|-------------|---|---|------|------|
| SMN1       | 17.25701812 | 0 | 0 | 225  | 429  |
| OXSM       | 17.00567455 | 0 | 0 | 1    | 149  |
| ADSS       | 16.97208308 | 0 | 0 | 412  | 593  |
| CRSP8P     | 16.89931271 | 0 | 0 | 4    | 153  |
| USP32P2    | 16.83132793 | 0 | 0 | 0    | 144  |
| BABAM1     | 16.79879398 | 0 | 0 | 406  | 583  |
| SF3A3      | 16.77278249 | 0 | 0 | 0    | 143  |
| EIF4G2     | 16.69551092 | 0 | 0 | 999  | 1046 |
| STYK1      | 16.48746377 | 0 | 0 | 4    | 146  |
| NALCN      | 16.37829917 | 0 | 0 | 472  | 627  |
| SERF1A     | 16.30243156 | 0 | 0 | 3    | 141  |
| TTC7B      | 16.30024395 | 0 | 0 | 760  | 853  |
| RAB11B     | 16.25346119 | 0 | 0 | 3244 | 2529 |
| BCAP31     | 16.24590897 | 0 | 0 | 731  | 829  |
| PPAP2A     | 16.23049312 | 0 | 0 | 108  | 284  |
| ZDHC4      | 16.13248686 | 0 | 0 | 210  | 388  |
| PSMB1      | 15.95261065 | 0 | 0 | 885  | 935  |
| TRIM8      | 15.90072442 | 0 | 0 | 1168 | 1138 |
| KIAA1244   | 15.70062924 | 0 | 0 | 96   | 260  |
| CD14       | 15.56121244 | 0 | 0 | 9    | 140  |
| OGDHL      | 15.49487005 | 0 | 0 | 2065 | 1730 |
| GYS1       | 15.49204486 | 0 | 0 | 83   | 241  |
| DGCR6L     | 15.46934572 | 0 | 0 | 166  | 330  |
| CDK16      | 15.36841602 | 0 | 0 | 1213 | 1149 |
| FUS        | 15.18774898 | 0 | 0 | 557  | 661  |
| HSD17B4    | 15.05560202 | 0 | 0 | 184  | 339  |
| RUNX1T1    | 15.04370892 | 0 | 0 | 148  | 303  |
| ATHL1      | 14.84400525 | 0 | 0 | 1    | 114  |
| EIF3B      | 14.70995773 | 0 | 0 | 643  | 713  |
| DHX16      | 14.70104744 | 0 | 0 | 248  | 391  |
| C11orf49   | 14.61872829 | 0 | 0 | 315  | 448  |
| VDAC3      | 14.50026189 | 0 | 0 | 361  | 484  |
| GPR75-ASB3 | 14.41043116 | 0 | 0 | 47   | 178  |
| PDE6B      | 14.40339392 | 0 | 0 | 376  | 494  |
| SALL1      | 14.38916293 | 0 | 0 | 738  | 774  |
| TST        | 14.28111972 | 0 | 0 | 114  | 253  |
| CDK20      | 14.22572127 | 0 | 0 | 471  | 566  |
| KANSL3     | 14.1305717  | 0 | 0 | 24   | 142  |
| AP2S1      | 14.11547146 | 0 | 0 | 471  | 563  |
| CTSZ       | 13.84728836 | 0 | 0 | 285  | 404  |
| GPR75      | 13.75632471 | 0 | 0 | 45   | 165  |

|          |             |   |   |      |      |
|----------|-------------|---|---|------|------|
| EXD2     | 13.55184374 | 0 | 0 | 164  | 289  |
| P4HA2    | 13.45891048 | 0 | 0 | 94   | 217  |
| SYNJ2    | 13.45235021 | 0 | 0 | 278  | 389  |
| KNDC1    | 13.44789223 | 0 | 0 | 327  | 430  |
| PHF20    | 13.20546217 | 0 | 0 | 23   | 127  |
| VPS13D   | 13.13328919 | 0 | 0 | 465  | 532  |
| CCT2     | 13.07470784 | 0 | 0 | 328  | 422  |
| BRD4     | 13.02341958 | 0 | 0 | 16   | 114  |
| DRG2     | 12.93179244 | 0 | 0 | 280  | 379  |
| DNAJB5   | 12.77907954 | 0 | 0 | 1    | 85   |
| PORCN    | 12.73435737 | 0 | 0 | 696  | 692  |
| NAF1     | 12.59248386 | 0 | 0 | 252  | 348  |
| CREM     | 12.51024939 | 0 | 0 | 95   | 202  |
| RCAN2    | 12.49336683 | 0 | 0 | 293  | 380  |
| FADS1    | 12.37285782 | 0 | 0 | 406  | 467  |
| UBA6     | 12.36948439 | 0 | 0 | 49   | 149  |
| ASNSD1   | 12.30398403 | 0 | 0 | 36   | 132  |
| RRBP1    | 12.2333768  | 0 | 0 | 172  | 271  |
| SLC25A16 | 12.2276009  | 0 | 0 | 0    | 76   |
| EBNA1BP2 | 12.20655743 | 0 | 0 | 75   | 176  |
| B4GALNT4 | 12.09127108 | 0 | 0 | 1104 | 952  |
| CERS2    | 12.07145162 | 0 | 0 | 918  | 826  |
| KIN      | 12.06563658 | 0 | 0 | 0    | 74   |
| AKAP1    | 11.90836494 | 0 | 0 | 2    | 76   |
| C4orf34  | 11.83567353 | 0 | 0 | 3    | 77   |
| ASPH     | 11.64249489 | 0 | 0 | 902  | 801  |
| TRAF4    | 11.4886157  | 0 | 0 | 2    | 71   |
| MTBP     | 11.39619515 | 0 | 0 | 1    | 68   |
| ELOVL5   | 11.34634372 | 0 | 0 | 698  | 652  |
| HNMT     | 11.2681065  | 0 | 0 | 8    | 79   |
| SON      | 11.21840478 | 0 | 0 | 522  | 524  |
| ST3GAL5  | 11.17313577 | 0 | 0 | 1050 | 884  |
| SERINC3  | 10.95897609 | 0 | 0 | 2266 | 1640 |
| EXOSC8   | 10.70540864 | 0 | 0 | 3    | 64   |
| DUSP1    | 10.63290576 | 0 | 0 | 28   | 100  |
| AP3B2    | 10.50216464 | 0 | 0 | 246  | 300  |
| GOLPH3   | 10.44878874 | 0 | 0 | 408  | 422  |
| AS3MT    | 10.30695721 | 0 | 0 | 0    | 54   |
| C11orf2  | 10.09992629 | 0 | 0 | 269  | 310  |
| FAM108A1 | 10.03519079 | 0 | 0 | 585  | 537  |
| ABCA7    | 9.96113987  | 0 | 0 | 68   | 136  |

|                    |             |            |            |      |      |
|--------------------|-------------|------------|------------|------|------|
| ZC3H13             | 9.9178706   | 0          | 0          | 0    | 50   |
| NSFP1              | 9.895690667 | 0          | 0          | 61   | 128  |
| DUSP14             | 9.890381968 | 0          | 0          | 192  | 245  |
| ZNF721             | 9.398049338 | 0          | 0          | 130  | 185  |
| TMCC2              | 9.039320956 | 0          | 0          | 700  | 587  |
| DDX39A             | 8.924289949 | 0          | 0          | 75   | 129  |
| RNF187             | 8.542715161 | 0          | 0          | 602  | 509  |
| PCDH17             | 8.504650141 | 0          | 0          | 120  | 163  |
| RAB19              | 8.415581589 | 0          | 0          | 0    | 36   |
| INSR               | 8.324215062 | 0          | 0          | 302  | 299  |
| APBB3              | 8.281271292 | 0          | 0          | 529  | 454  |
| SOSTDC1            | 8.178473753 | 4.4409E-16 | 2.3355E-15 | 0    | 34   |
| PAPSS1             | 8.174040169 | 4.4409E-16 | 2.3355E-15 | 1893 | 1291 |
| LOH12CR1           | 8.116208411 | 4.4409E-16 | 2.3355E-15 | 39   | 84   |
| SRPR               | 8.031407166 | 8.8818E-16 | 4.6243E-15 | 187  | 209  |
| MYBPC1             | 7.981503895 | 1.3323E-15 | 6.9027E-15 | 63   | 106  |
| CORO2B             | 7.953867013 | 1.7764E-15 | 9.167E-15  | 1719 | 1179 |
| ARAF               | 7.939170639 | 1.9984E-15 | 1.0292E-14 | 213  | 227  |
| KLHL22             | 7.93452354  | 2.2204E-15 | 1.1429E-14 | 1375 | 973  |
| RPL4               | 7.92571875  | 2.2204E-15 | 1.1429E-14 | 3617 | 2272 |
| C8orf46            | 7.820058159 | 5.3291E-15 | 2.7148E-14 | 185  | 204  |
| SLC25A6 (chrY 145) | 7.53167626  | 5.0182E-14 | 2.4724E-13 | 2739 | 1752 |
| VRK3               | 7.50906726  | 5.9508E-14 | 2.9178E-13 | 219  | 224  |
| WDR17              | 7.476195513 | 7.6383E-14 | 3.7335E-13 | 64   | 101  |
| FUNDC2             | 7.343717149 | 2.0783E-13 | 1.0037E-12 | 275  | 261  |
| CDH15              | 7.343625755 | 2.0783E-13 | 1.0037E-12 | 425  | 363  |
| RLIM               | 7.296088298 | 2.9621E-13 | 1.4162E-12 | 1    | 29   |
| SLIT2              | 7.207561934 | 5.6977E-13 | 2.6981E-12 | 132  | 154  |
| CKAP5              | 7.126728767 | 1.0278E-12 | 4.8089E-12 | 188  | 195  |
| ADIPOR1            | 6.967952987 | 3.2159E-12 | 1.4795E-11 | 307  | 276  |
| DDX5               | 6.928161738 | 4.2635E-12 | 1.9522E-11 | 750  | 560  |
| RAB4A              | 6.924062356 | 4.3887E-12 | 2.0091E-11 | 279  | 256  |
| INPP5F             | 6.920608965 | 4.4971E-12 | 2.0583E-11 | 282  | 258  |
| TTC19              | 6.804128451 | 1.0166E-11 | 4.5965E-11 | 524  | 415  |
| LMAN2L             | 6.643599458 | 3.0612E-11 | 1.3555E-10 | 291  | 259  |
| ASB6               | 6.638663154 | 3.1654E-11 | 1.4014E-10 | 152  | 161  |
| HAPLN4             | 6.578754404 | 4.7441E-11 | 2.0908E-10 | 0    | 22   |
| SLC25A6 (chrX 150) | 6.470520271 | 9.7666E-11 | 4.2515E-10 | 3009 | 1851 |
| ATF4               | 6.332758776 | 2.4082E-10 | 1.0269E-09 | 394  | 321  |
| PAPOLA             | 6.294272284 | 3.0885E-10 | 1.3108E-09 | 117  | 130  |
| NUAK2              | 6.272595071 | 3.5508E-10 | 1.5062E-09 | 0    | 20   |

|              |             |            |            |      |      |
|--------------|-------------|------------|------------|------|------|
| ODZ1         | 6.272595071 | 3.5508E-10 | 1.5062E-09 | 0    | 20   |
| LOC100505666 | 6.186162198 | 6.1647E-10 | 2.5896E-09 | 79   | 99   |
| CNNM2        | 6.113768863 | 9.7305E-10 | 4.0526E-09 | 0    | 19   |
| GNB1         | 5.768640953 | 7.9913E-09 | 3.2034E-08 | 1751 | 1110 |
| OS9          | 5.542138941 | 2.988E-08  | 1.1666E-07 | 1174 | 771  |
| STMN2        | 5.515783543 | 3.4723E-08 | 1.3498E-07 | 432  | 328  |
| ICA1         | 5.368377859 | 7.9448E-08 | 3.0399E-07 | 87   | 96   |
| PWP2         | 5.305423754 | 1.1241E-07 | 4.2768E-07 | 653  | 458  |
| SYNGAP1      | 5.29243761  | 1.207E-07  | 4.5905E-07 | 37   | 55   |
| GAS6         | 5.276658579 | 1.3156E-07 | 4.9786E-07 | 1118 | 730  |
| LOC100287765 | 5.225636337 | 1.7356E-07 | 6.5214E-07 | 3    | 19   |
| HERC1        | 5.165731146 | 2.395E-07  | 8.9433E-07 | 1870 | 1153 |
| CORO1B       | 5.163434644 | 2.4246E-07 | 9.0523E-07 | 1262 | 809  |
| PHKG1        | 5.10895728  | 3.2394E-07 | 1.2025E-06 | 52   | 66   |
| NSUN2        | 5.076892335 | 3.8366E-07 | 1.4137E-06 | 320  | 249  |
| EPB49        | 5.065471325 | 4.0739E-07 | 1.5009E-06 | 1382 | 874  |
| FLJ45340     | 5.048905479 | 4.4435E-07 | 1.6365E-06 | 294  | 232  |
| FKBP8        | 5.021456733 | 5.1281E-07 | 1.8769E-06 | 2518 | 1507 |
| H2AFY2       | 4.837002135 | 1.3181E-06 | 4.7507E-06 | 19   | 35   |
| CHRD         | 4.801661342 | 1.5735E-06 | 5.6365E-06 | 293  | 227  |
| CPEB1        | 4.742446918 | 2.1115E-06 | 7.5221E-06 | 393  | 288  |
| TUBG2        | 4.634964295 | 3.57E-06   | 1.2555E-05 | 1709 | 1042 |
| C1orf96      | 4.593554467 | 4.3576E-06 | 1.5254E-05 | 62   | 69   |
| DNAJB6       | 4.578710164 | 4.6785E-06 | 1.6373E-05 | 1548 | 950  |
| PLEKHO1      | 4.434787122 | 9.2163E-06 | 3.1684E-05 | 165  | 139  |
| SAP30BP      | 4.413965712 | 1.0149E-05 | 3.4882E-05 | 170  | 142  |
| SUCLA2       | 4.362990503 | 1.283E-05  | 4.3804E-05 | 818  | 530  |
| CLEC16A      | 4.339753339 | 1.4264E-05 | 4.8695E-05 | 2    | 13   |
| GLRX5        | 4.276064426 | 1.9023E-05 | 6.419E-05  | 54   | 60   |
| GLIS3        | 4.207780497 | 2.5789E-05 | 8.6437E-05 | 0    | 9    |
| SCD5         | 3.991633148 | 6.562E-05  | 0.00021582 | 48   | 53   |
| SYCE2        | 3.967133138 | 7.2742E-05 | 0.00023785 | 0    | 8    |
| CRBN         | 3.869568112 | 0.00010903 | 0.00035358 | 35   | 42   |
| TERF1        | 3.85989038  | 0.00011344 | 0.00036772 | 83   | 77   |
| ATP1A1OS     | 3.710912917 | 0.00020651 | 0.00065966 | 0    | 7    |
| REEP2        | 3.604624203 | 0.0003126  | 0.0009839  | 486  | 320  |
| BCAN         | 3.419059886 | 0.00062838 | 0.00193153 | 1295 | 769  |
| GSTT2        | 3.416883252 | 0.00063342 | 0.00194678 | 19   | 26   |
| THYN1        | 3.296871979 | 0.00097768 | 0.0029825  | 3    | 10   |
| ABHD12       | 3.266648152 | 0.00108829 | 0.00329671 | 1028 | 617  |
| MRAS         | 3.225129466 | 0.00125916 | 0.00381382 | 500  | 320  |

|           |             |            |            |      |      |
|-----------|-------------|------------|------------|------|------|
| SYS1      | 3.219169933 | 0.00128562 | 0.00389247 | 1    | 7    |
| ETV1      | 3.188216406 | 0.00143153 | 0.0043003  | 137  | 105  |
| CACNA1G   | 3.133932622 | 0.0017248  | 0.00517995 | 94   | 77   |
| SUPT6H    | 3.084728909 | 0.00203738 | 0.00605725 | 160  | 118  |
| ZNF692    | 3.031985327 | 0.00242951 | 0.00722217 | 140  | 105  |
| SLC25A1   | 3.030439309 | 0.00244198 | 0.00725832 | 383  | 249  |
| MUC4      | 2.93006467  | 0.00338891 | 0.00987593 | 59   | 52   |
| BEND5     | 2.809558189 | 0.00496096 | 0.01430746 | 11   | 16   |
| RPS23     | 2.805185727 | 0.00502876 | 0.01449943 | 0    | 4    |
| TPCN2     | 2.805185727 | 0.00502876 | 0.01449943 | 0    | 4    |
| XPNPEP1   | 2.703874958 | 0.00685361 | 0.01956095 | 468  | 291  |
| CELF1     | 2.480696577 | 0.01311259 | 0.03657707 | 297  | 190  |
| MAP7      | 2.429985112 | 0.01509944 | 0.04162799 | 112  | 81   |
| UBE2E1    | 2.429361882 | 0.01512543 | 0.04169471 | 0    | 3    |
| SNRPN     | 2.379511197 | 0.01733558 | 0.04777596 | 1385 | 783  |
| LAMTOR1   | 2.292565044 | 0.02187306 | 0.05948231 | 1009 | 578  |
| SENP5     | 2.164944407 | 0.03039194 | 0.08146531 | 16   | 17   |
| C14orf180 | 1.983565491 | 0.0473043  | 0.12299433 | 0    | 2    |
| IGSF3     | 1.983565491 | 0.0473043  | 0.12299433 | 0    | 2    |
| LOC728989 | 1.983565491 | 0.0473043  | 0.12299433 | 0    | 2    |
| LRRC4     | 1.983565491 | 0.0473043  | 0.12299433 | 0    | 2    |
| PAX5      | 1.983565491 | 0.0473043  | 0.12299433 | 0    | 2    |
| KCMF1     | 1.908215915 | 0.05636332 | 0.14649954 | 22   | 20   |
| UBB       | 1.850700225 | 0.06421269 | 0.16430977 | 4700 | 2501 |
| CACNB3    | 1.815957476 | 0.0693769  | 0.17750471 | 760  | 431  |
| NCKAP1    | 1.672672557 | 0.09439177 | 0.23748158 | 2556 | 1374 |
| AK3       | 1.662902652 | 0.09633192 | 0.24231072 | 81   | 55   |
| ANK3      | 1.635837625 | 0.10187358 | 0.25619496 | 647  | 366  |
| MAGED1    | 1.623743716 | 0.10443052 | 0.26259702 | 1418 | 775  |
| CLIP3     | 1.541396938 | 0.12322021 | 0.30393279 | 1353 | 738  |
| PFKP      | 1.486071368 | 0.13726024 | 0.33852801 | 3676 | 1948 |
| SEPT7     | 1.42847392  | 0.1531555  | 0.3711652  | 899  | 495  |
| C9orf89   | 1.41148021  | 0.15810307 | 0.38129206 | 127  | 79   |
| P2RX7     | 1.411292536 | 0.15815837 | 0.38138613 | 349  | 201  |
| ANAPC10   | 1.402592482 | 0.16073839 | 0.38621452 | 0    | 1    |
| ANXA13    | 1.402592482 | 0.16073839 | 0.38621452 | 0    | 1    |
| C1QTNF6   | 1.402592482 | 0.16073839 | 0.38621452 | 0    | 1    |
| CATSPERB  | 1.402592482 | 0.16073839 | 0.38621452 | 0    | 1    |
| CCDC60    | 1.402592482 | 0.16073839 | 0.38621452 | 0    | 1    |
| DCAF4L1   | 1.402592482 | 0.16073839 | 0.38621452 | 0    | 1    |
| DEPDC1B   | 1.402592482 | 0.16073839 | 0.38621452 | 0    | 1    |



|              |             |            |            |      |     |
|--------------|-------------|------------|------------|------|-----|
| FAM46D       | 1.402592482 | 0.16073839 | 0.38621452 | 0    | 1   |
| FIGF         | 1.402592482 | 0.16073839 | 0.38621452 | 0    | 1   |
| HLA-DMB      | 1.402592482 | 0.16073839 | 0.38621452 | 0    | 1   |
| HM13         | 1.402592482 | 0.16073839 | 0.38621452 | 0    | 1   |
| HOTAIR       | 1.402592482 | 0.16073839 | 0.38621452 | 0    | 1   |
| LINC00265    | 1.402592482 | 0.16073839 | 0.38621452 | 0    | 1   |
| LOC100130480 | 1.402592482 | 0.16073839 | 0.38621452 | 0    | 1   |
| LOC152578    | 1.402592482 | 0.16073839 | 0.38621452 | 0    | 1   |
| LOC399829    | 1.402592482 | 0.16073839 | 0.38621452 | 0    | 1   |
| LOC730091    | 1.402592482 | 0.16073839 | 0.38621452 | 0    | 1   |
| LOC731275    | 1.402592482 | 0.16073839 | 0.38621452 | 0    | 1   |
| MARCO        | 1.402592482 | 0.16073839 | 0.38621452 | 0    | 1   |
| MEX3D        | 1.402592482 | 0.16073839 | 0.38621452 | 0    | 1   |
| MGAT4C       | 1.402592482 | 0.16073839 | 0.38621452 | 0    | 1   |
| MRPS16       | 1.402592482 | 0.16073839 | 0.38621452 | 0    | 1   |
| MST4         | 1.402592482 | 0.16073839 | 0.38621452 | 0    | 1   |
| NHSL1        | 1.402592482 | 0.16073839 | 0.38621452 | 0    | 1   |
| PDSS2        | 1.402592482 | 0.16073839 | 0.38621452 | 0    | 1   |
| PIGO         | 1.402592482 | 0.16073839 | 0.38621452 | 0    | 1   |
| PKP2         | 1.402592482 | 0.16073839 | 0.38621452 | 0    | 1   |
| POLR2K       | 1.402592482 | 0.16073839 | 0.38621452 | 0    | 1   |
| SEC16B       | 1.402592482 | 0.16073839 | 0.38621452 | 0    | 1   |
| SLC16A10     | 1.402592482 | 0.16073839 | 0.38621452 | 0    | 1   |
| TRAPPC2      | 1.402592482 | 0.16073839 | 0.38621452 | 0    | 1   |
| TSTD2        | 1.402592482 | 0.16073839 | 0.38621452 | 0    | 1   |
| USP49        | 1.402592482 | 0.16073839 | 0.38621452 | 0    | 1   |
| VPS16        | 1.402592482 | 0.16073839 | 0.38621452 | 0    | 1   |
| XRCC1        | 1.402592482 | 0.16073839 | 0.38621452 | 0    | 1   |
| ROBO2        | 1.396928108 | 0.16243519 | 0.39021136 | 99   | 63  |
| ARL1         | 1.387743158 | 0.16521527 | 0.39684908 | 61   | 41  |
| NRXN2        | 1.382242853 | 0.16689715 | 0.40084782 | 439  | 249 |
| MANBAL       | 1.349309846 | 0.17723746 | 0.42559546 | 11   | 10  |
| CDK11A       | 1.312094233 | 0.18948834 | 0.45491978 | 3    | 4   |
| SETD1A       | 1.259603406 | 0.20781247 | 0.49886079 | 166  | 99  |
| DCHS2        | 1.207943636 | 0.22706894 | 0.53050016 | 1    | 2   |
| CEBPD        | 1.146429477 | 0.25161749 | 0.58779414 | 268  | 153 |
| TMX2         | 1.127083093 | 0.25970735 | 0.60663199 | 1792 | 953 |
| WDR1         | 1.007195989 | 0.3138406  | 0.70750962 | 957  | 514 |
| CYTH3        | 0.975280318 | 0.32942123 | 0.74256242 | 4    | 4   |
| RIPK1        | 0.919127364 | 0.35802896 | 0.80673744 | 98   | 58  |
| ADC          | 0.894538071 | 0.37103407 | 0.83596102 | 777  | 417 |

|         |             |            |            |      |      |
|---------|-------------|------------|------------|------|------|
| CCBL1   | 0.888227911 | 0.37441817 | 0.84350436 | 115  | 67   |
| CHCHD5  | 0.809307926 | 0.41833805 | 0.9419047  | 26   | 17   |
| SKP1    | 0.658557426 | 0.51018001 | 1          | 1196 | 628  |
| ARRB1   | 0.621500986 | 0.53427005 | 1          | 239  | 130  |
| SLC41A3 | 0.586252685 | 0.55770572 | 1          | 1571 | 819  |
| HSPB8   | 0.551393227 | 0.58136414 | 1          | 178  | 97   |
| AGMO    | 0.487639894 | 0.62580493 | 1          | 1    | 1    |
| CDKAL1  | 0.487639894 | 0.62580493 | 1          | 1    | 1    |
| DCAF7   | 0.487639894 | 0.62580493 | 1          | 1    | 1    |
| FAT3    | 0.487639894 | 0.62580493 | 1          | 1    | 1    |
| GCSH    | 0.487639894 | 0.62580493 | 1          | 1    | 1    |
| KLHL1   | 0.487639894 | 0.62580493 | 1          | 1    | 1    |
| MMP23A  | 0.487639894 | 0.62580493 | 1          | 1    | 1    |
| TRIM26  | 0.487639894 | 0.62580493 | 1          | 1    | 1    |
| UGT1A6  | 0.487639894 | 0.62580493 | 1          | 1    | 1    |
| NLRX1   | 0.264877292 | 0.79110399 | 1          | 117  | 62   |
| KDM5C   | 0.23072418  | 0.81752909 | 1          | 35   | 19   |
| SDHA    | 0.222884589 | 0.82362533 | 1          | 4907 | 2508 |
| CAPZA2  | 0.209102463 | 0.83436825 | 1          | 519  | 268  |
| RPLP0   | 0.132860089 | 0.89430403 | 1          | 1349 | 690  |
| DLST    | 0.064965166 | 0.94820174 | 1          | 507  | 259  |

Genes showing test statistics  $< 0$  were eliminated from this table.

## Supplemental figure 1

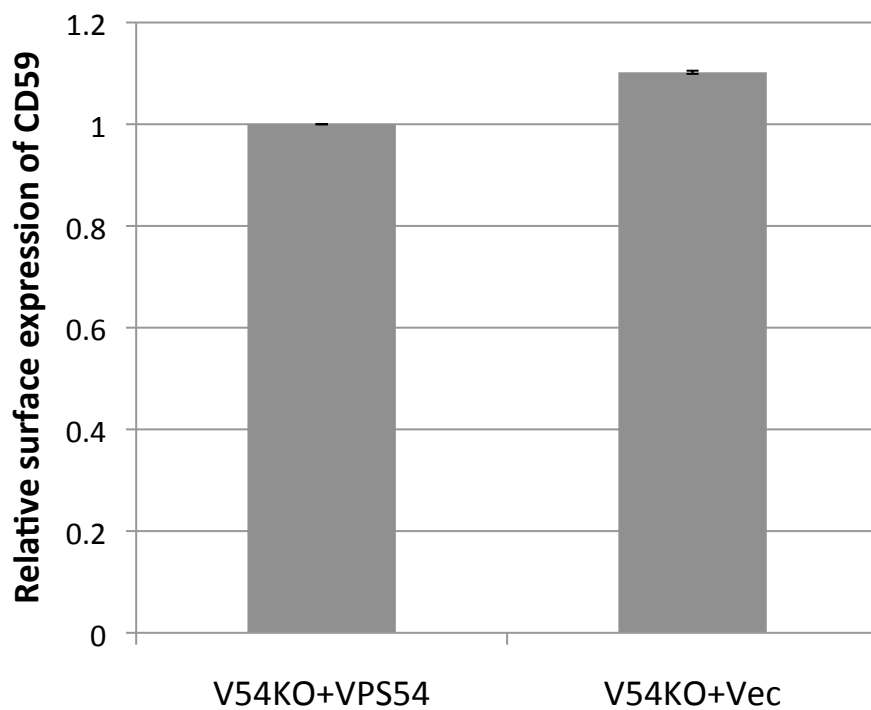

Supplemental Fig. 1. Supporting data for Fig. 4

Relative surface expression of CD59. Surface expression of CD59 was analyzed by flow cytometry. The geometric mean fluorescence of surface CD59 in cells was quantified and relative expression was calculated. Error bars represent the SDs (n=2).

## Supplemental figure 2

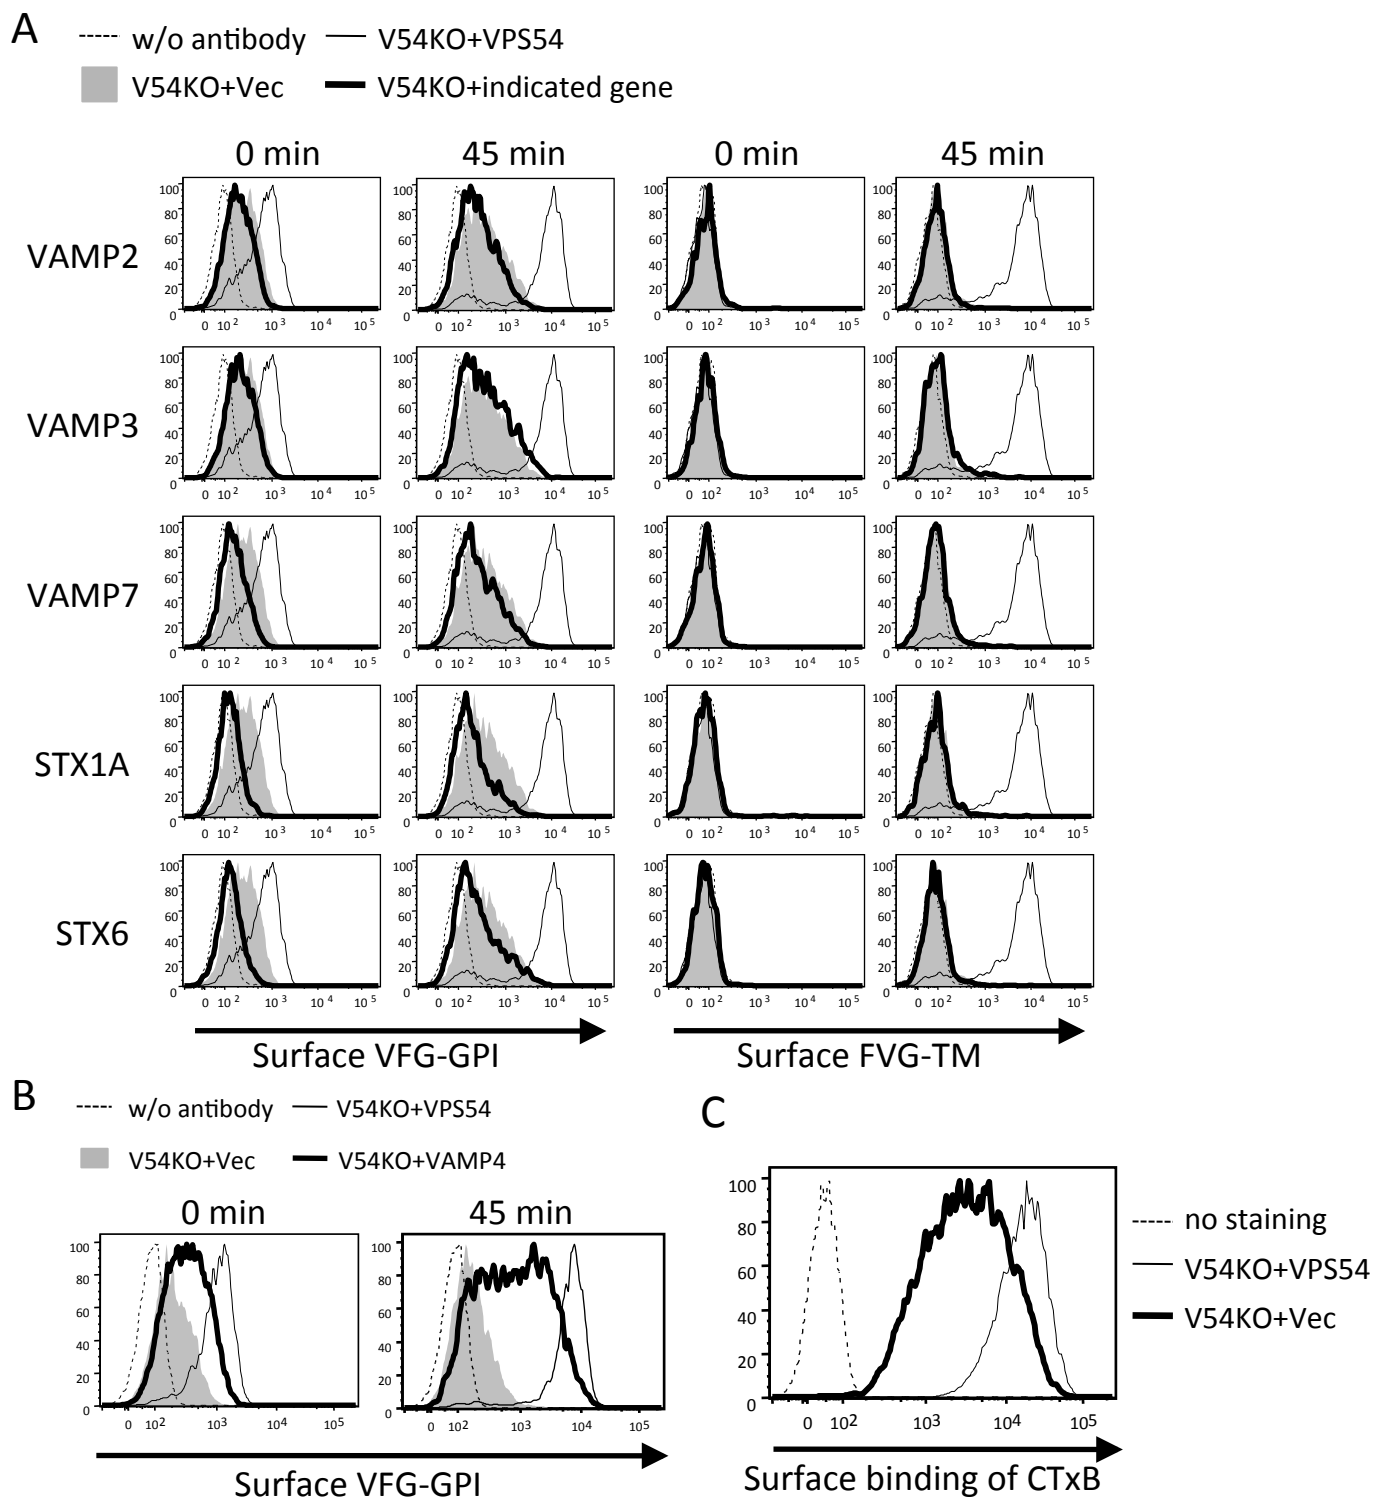

Supplemental Fig. 2. Supporting data for Fig. 5

A. Transport assay of VFG-GPI (left) and FVG-TM (right) in V54KO cells transiently transfected with the indicated genes. B. V54KO cells stably expressing VAMP4 (V54KO+VAMP4) in which the anterograde transport of VFG-GPI was efficiently restored were collected twice by cell sorting. VFG-GPI transport was assayed in V54KO+VAMP4 cells after sorting. C. Cell-surface binding of CTxB. The cells were incubated with Alexa Fluor 488-conjugated CTxB on ice for 15 min. Fluorescent intensity was analyzed by flow cytometry.

# Supplemental figure 3

**A**

- w/o antibody
- V54KO+VPS54
- V54KO+Vec
- V54KO+TM87A/B

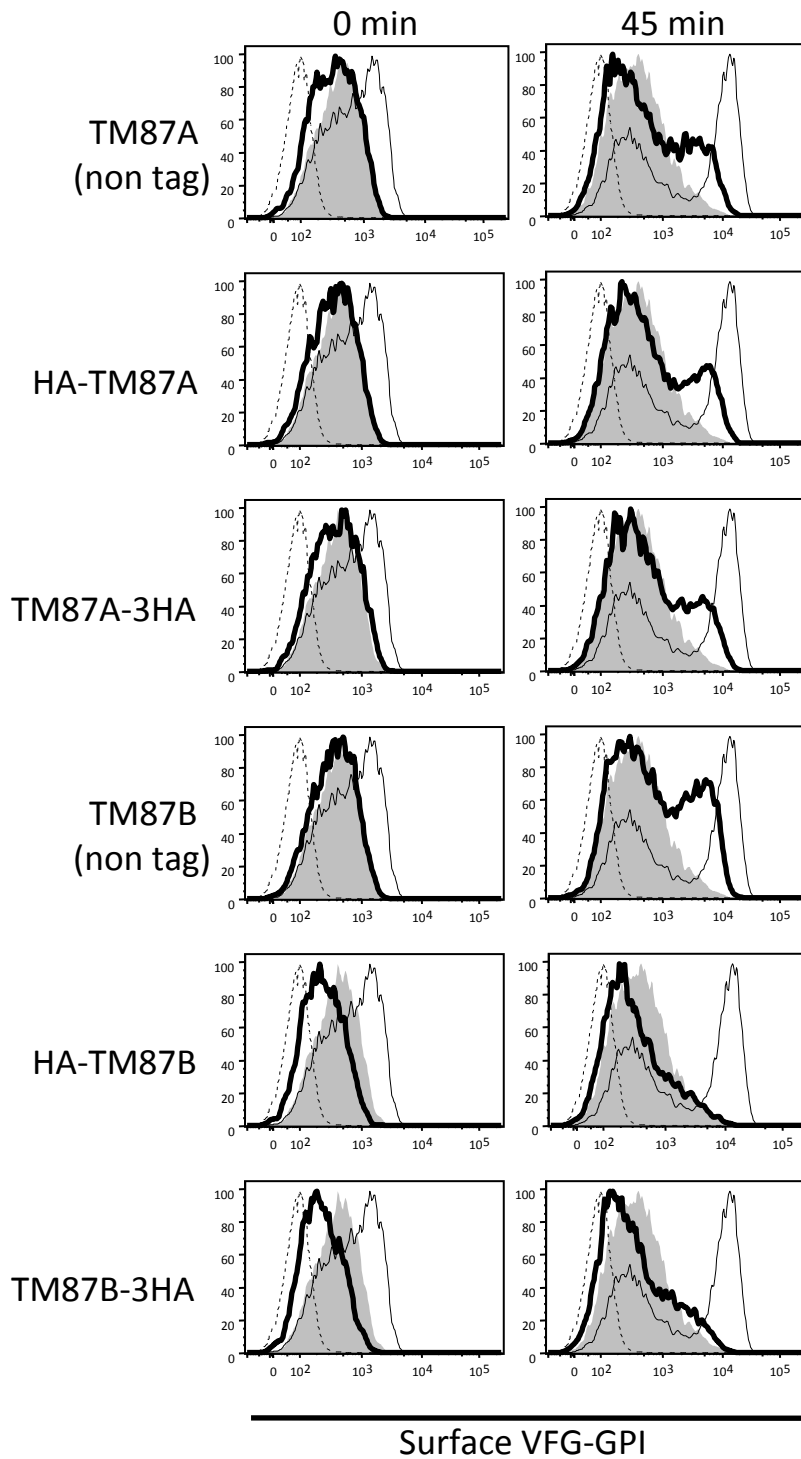

**B**

- w/o antibody
- V54KO+VPS54
- V54KO+Vec
- V54KO+TM87A

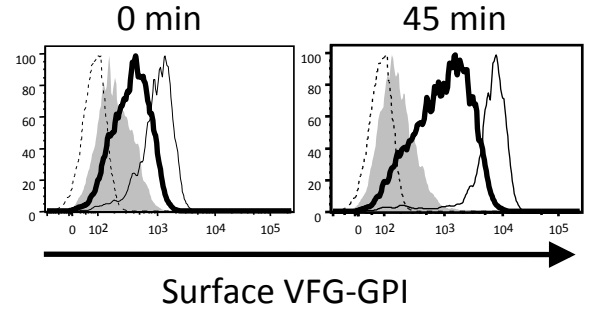

Supplemental Fig. 3. Supporting data 1 for Fig. 6

A. Transport assay of VFG-GPI in V54KO cells transiently transfected with the indicated genes. B. V54KO cells stably expressing HA-TMEM87A (V54KO+TM87A) in which the anterograde transport of VFG-GPI was efficiently restored were collected twice by cell sorting. VFG-GPI transport was assayed in V54KO+TM87A cells after sorting.

## Supplemental figure 4

A

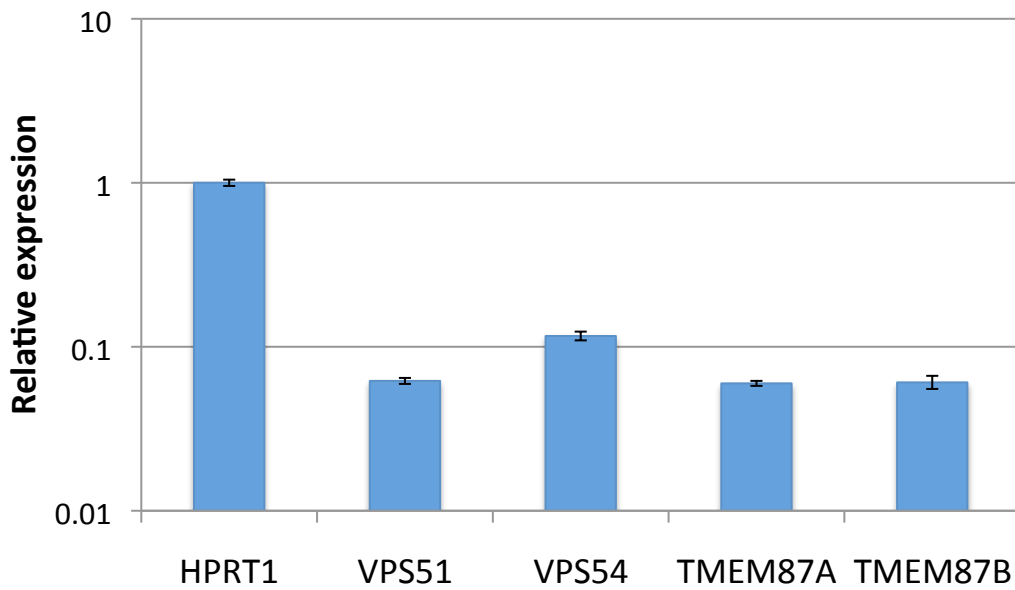

B

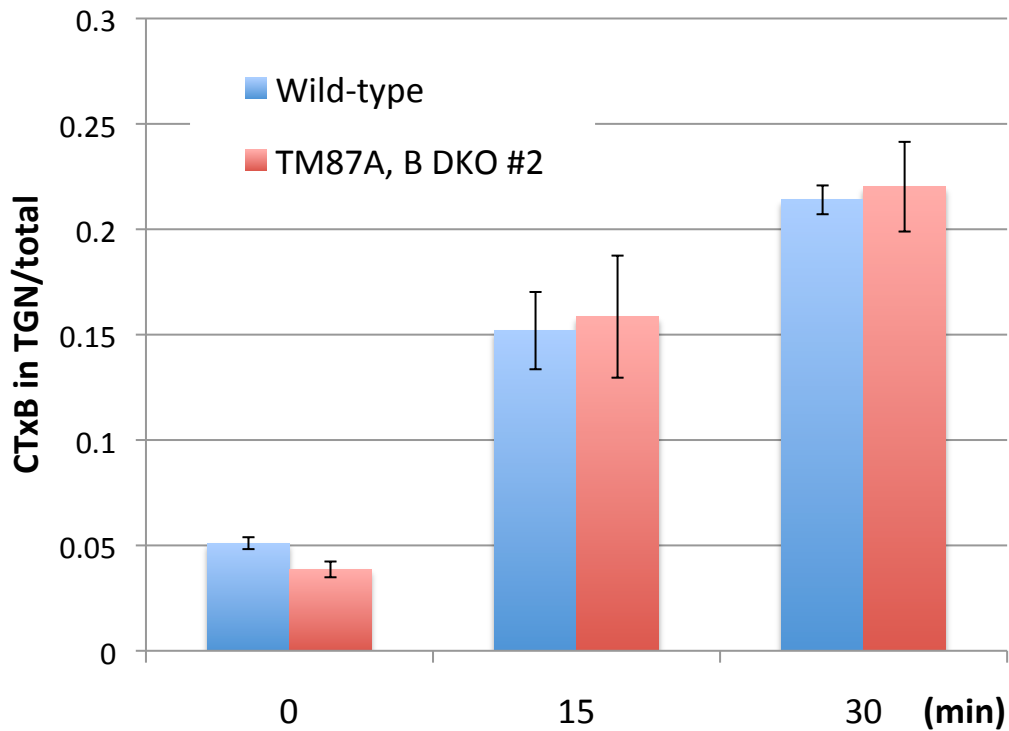

Supplemental Fig. 4. Supporting data 2 for Fig. 6

A. Relative expression of TMEM87A and B in wild-type HEK293 cells. The expression of TMEM87A and B relative to HPRT1 expression was analyzed by qRT-PCR. Both TMEM87A and B were expressed at levels comparable to VPS51 and VPS54 in HEK293 cells. B. Retrograde transport assay in TMEM87A- and TMEM87B-double knockout HEK293 cells using CTxB. CTxB retrograde transport at 0, 15 and 30 min in wild-type HEK293 cells and TMEM87A- and TMEM87B-double knockout HEK293 cells were similar.

## Supplemental figure 5

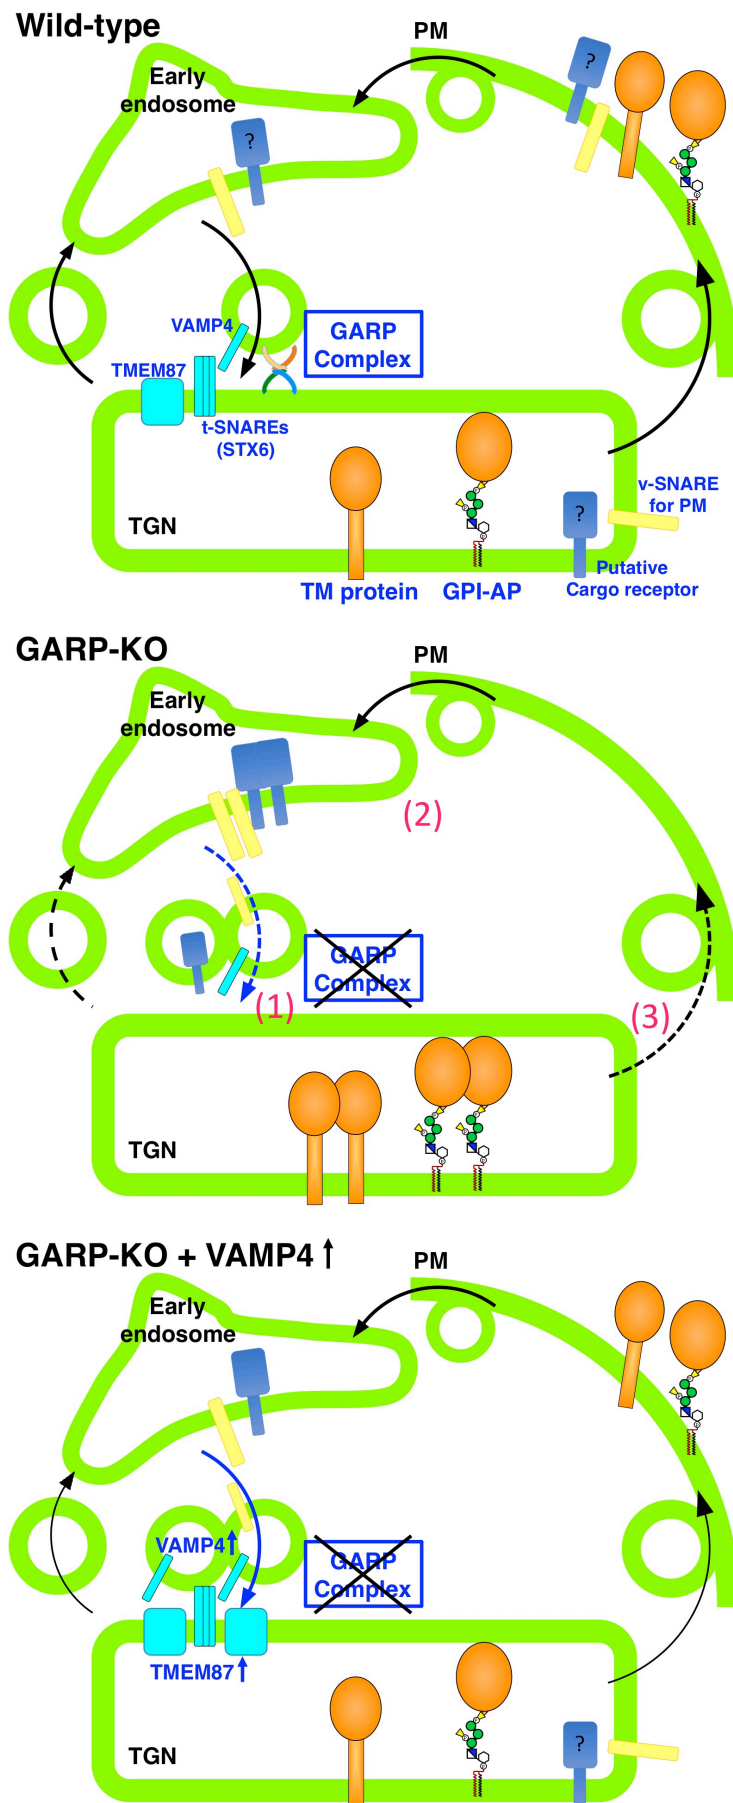

Supplemental Fig. 5. The coupling between anterograde and retrograde pathway in post-Golgi compartment.

(Top panel) Vesicular transport in post-Golgi compartment in wild-type cells. GPI-APs and transmembrane (TM) proteins are transported by putative cargo receptors. Transport carriers contain v-SNAREs required for fusion with the plasma membrane (PM). Putative cargo receptors and v-SNAREs are then endocytosed and recycled back to the TGN in GARP complex- and VAMP4- dependent manner. TMEM87A might be involved in this step. (Middle panel) Vesicle transport in GARP-KO cells. (1) Recycling from the endosomes to the TGN is defective because of GARP-KO (retrograde transport defect). (2) Transport machineries including putative cargo receptors and v-SNAREs required for anterograde transport are accumulated in the endosomes or transport vesicles derived from the endosomes. (3) Post-Golgi anterograde transport is defective because of the reduced availability of transport machineries. (Bottom panel) Vesicle transport in GARP-KO+VAMP4 cells. Because overexpression of VAMP4 partially restores endosome-to-TGN retrograde transport, levels of TGN localized transport machineries slightly increase. This increase leads to enhancement of post-Golgi anterograde transport.
